# Supplementary material for: Assessing the breeding phenology of a threatened frog species using eDNA and automatic acoustic monitoring
Source: PeerJ journal article supplement (doi:10.7717/peerj.14679), 2023-01-23
Supplement: Table_S2.docx [file Table_S2.docx]

| **Species** | **NCBI accession number** |
| --- | --- |
| *Pseudacris maculata* | EF988161, KJ536217, KJ536215 |
| *Pseudacris triseriata* | KJ536225, KJ536224 |
| *Pseudacris crucifer* | AF488345, AF488344, AF488343, AF488342, AF488341, AF488340, AF488339, AF488338, AF488337, AF488336, AF488335, AF488334, AF488333, AF488332, AF488331, AF488330, AF488329, AF488328, AF488327, AF488326 |
| *Dryophytes versicolor* | AY831021, AY831016, AY831014, AY831010, AY831009, AY831008, AY831007, AY831006, AY831005, AY831004, AY831003, AY830998, AY830995, AY830994, AY830992, AY830987, AY830985, AY830981, AY830974, AY830973 |
| *Lithobates sylvaticus* | MG002398, MG002397, MG002396, MG002395, MG002394, MG002393, MG002392, MG002391, EU203546, EU203545, EU203544, EU203543, EU203542, EU203541, EU203540, EU203539, EU203538, EU203537, EU203536, EU203535 |
| *Lithobates septentrionalis* | AY083273, AY083272, KX269314 |
| *Lithobates catesbeianus* | KX344492, KX344491, KX344490, KX344489, KX344488, KX344487, KX344486, KX344485, DQ474180, AY210399, AY210398, AY210397, AY210396, AY210395, AY210394, AY210393, AY210392, AY210391, AY210390 |
| *Lithobates clamitans* | DQ792700, DQ792699, DQ792698, DQ792697, DQ792696, DQ792695, DQ792694, DQ792693, DQ792692, DQ792691, DQ792690, DQ792689, DQ792688, DQ792687, DQ792686, DQ792685, DQ792684, DQ792683, DQ792682, DQ792681 |
| *Lithobates palustris* | KX269353 |
| *Lithobates pipiens* | EU370726, EU370725, EU370724, KM396244, KM396243, KM396242, KM396236, KM396235, KM396234, KM396233, KM396232, KM396231, KM396230, KM396229, KM396228 |
| *Anaxyrus americanus* | AB159264 |
