# Supplementary material for: Assessing the breeding phenology of a threatened frog species using eDNA and automatic acoustic monitoring
Source: PeerJ journal article supplement (doi:10.7717/peerj.14679), 2023-01-23
Supplement: Table_S4.docx [file Table_S4.docx]

| **Site type** | **Location** | **Latitude** | **Longitude** | ***P. maculata*** |
| --- | --- | --- | --- | --- |
| marsh | Round Field | 44.51761 | -76.38839 | ■ presence |
| marsh | Old Mill Road | 44.26667 | -76.53433 | ■ presence |
| marsh | Cecil Graham Park | 44.30986 | -76.44562 | ■ presence |
| marsh | Bracken Field | 44.64360 | -76.33989 | ■ presence |
| marsh | Indian Lake Road | 44.57868 | -76.32969 | □ absence |
| marsh | Silver Maple Swamp | 44.53157 | -76.37546 | □ absence |
| marsh | Osprey Marsh | 44.51341 | -76.39337 | □ absence |
| marsh | Beaver Pond | 44.54214 | -76.39959 | □ absence |
| marsh | Leroi Marsh | 44.55121 | -76.37153 | □ absence |
| lake | Warner Lake | 44.52923 | -76.38315 | □ absence |
| lake | Elbow Lake | 44.47332 | -76.430148 | □ absence |
